# Supplementary material for: Increased NEFA levels reduce blood Mg2+ in hypertriacylglycerolaemic states via direct binding of NEFA to Mg2+
Source: Springer Nature journal article supplement (doi:10.1007/s00125-018-4771-3), 2018-11-13
Supplement: MOESM1 [file 16269356]

**ESM Table 1. Characteristics of the Overweight Individuals from the 300-Obesity Cohort.**

| <b>Variable</b>                   | <b>300-Obesity cohort<br/>mean <math>\pm</math> SD</b> | <b><i>n</i></b> |
|-----------------------------------|--------------------------------------------------------|-----------------|
| <b>Demographics</b>               |                                                        |                 |
| Sex (m:f, %)                      | 45:55 (m:f)                                            | 285             |
| BMI (Kg/m <sup>2</sup> )          | 30.7 $\pm$ 3.4                                         | 285             |
| Age (years)                       | 67 $\pm$ 5                                             | 285             |
| Waist circumference (cm)          | 107 $\pm$ 10                                           | 285             |
| SBP (mmHg)                        | 130 $\pm$ 14                                           | 285             |
| DBP (mmHg)                        | 80 $\pm$ 9                                             | 285             |
| Heart rate (beats/min)            | 63 $\pm$ 10                                            | 282             |
| <b>Laboratory measures</b>        |                                                        |                 |
| Magnesium (mmol/l)                | 0.89 $\pm$ 0.09                                        | 285             |
| Triacylglycerols (mmol/l)         | 1.8 $\pm$ 1.0                                          | 284             |
| Glucose (mmol/l)                  | 5.7 $\pm$ 1.3                                          | 284             |
| HOMA-IR                           | 13.7 $\pm$ 19.1                                        | 283             |
| HbA <sub>1c</sub> (mmol/mol)      | 41.8 $\pm$ 8.0                                         | 284             |
| Total cholesterol (mmol/l)        | 6.3 $\pm$ 1.1                                          | 284             |
| Triacylglycerols in VLDL (mmol/l) | 1.23 $\pm$ 0.72                                        | 284             |
| Triacylglycerols in LDL (mmol/l)  | 0.23 $\pm$ 0.07                                        | 284             |
| Triacylglycerols in HDL (mmol/l)  | 0.15 $\pm$ 0.04                                        | 284             |
| Cholesterol in VLDL (mmol/l)      | 1.14 $\pm$ 0.37                                        | 284             |
| Cholesterol in LDL (mmol/l)       | 2.25 $\pm$ 0.64                                        | 284             |
| Cholesterol in HDL (mmol/l)       | 1.31 $\pm$ 0.29                                        | 284             |
| ApoA1 (g/l)                       | 1.59 $\pm$ 0.01                                        | 283             |
| ApoB (g/l)                        | 1.19 $\pm$ 0.02                                        | 283             |
| Mean diameter VLDL particle (nm)  | 36.6 $\pm$ 1.2                                         | 284             |
| Mean diameter LDL particle (nm)   | 23.5 $\pm$ 0.1                                         | 284             |
| Mean diameter HDL particle (nm)   | 9.8 $\pm$ 0.2                                          | 284             |

ApoA1, apolipoprotein A1; ApoB, apolipoprotein B; BMI, body mass index; DBP, diastolic blood pressure; f, female; HbA<sub>1c</sub>, glycated hemoglobin; HDL, high-density lipoprotein; HOMA-IR, homeostatic model assessment of insulin resistance; LDL, low-density lipoprotein; m, male; SBP, systolic blood pressure; VLDL, very-low-density lipoprotein.

**ESM Table 2. Univariate regression analysis of HOMA-IR, as dependent variable, and plasma triacylglycerols.**

| <b>Variable</b>                  | <b>Correlation coefficient</b> | <b><i>p</i>-value</b> | <b><i>n</i></b> |
|----------------------------------|--------------------------------|-----------------------|-----------------|
| Plasma triacylglycerols (mmol/L) | 0.245                          | 0.000                 | 284             |

**ESM Table 3. Univariate regression analysis of HOMA-IR, as dependent variable, and triacylglycerols in VLDL.**

| <b>Variable</b>          | <b>Correlation coefficient</b> | <b><i>p</i>-value</b> | <b><i>n</i></b> |
|--------------------------|--------------------------------|-----------------------|-----------------|
| Triacylglycerols in VLDL | 0.236                          | 0.000                 | 284             |

**ESM Table 4. Multivariate regression analysis of HOMA-IR and plasma triacylglycerols with the serum Mg<sup>2+</sup> concentration as dependent variable.**

| <b>Variable</b>                  | <b>Correlation coefficient</b> | <b><i>p</i>-value</b> | <b><i>n</i></b> |
|----------------------------------|--------------------------------|-----------------------|-----------------|
| HOMA-IR                          | -0.089                         | 0.143                 | 283             |
| Plasma triacylglycerols (mmol/l) | -0.137                         | 0.024                 | 284             |

HOMA-IR, homeostatic model assessment of insulin resistance

**ESM Table 5. Multivariate regression analysis of HOMA-IR and plasma triacylglycerols in VLDL particles with the serum Mg<sup>2+</sup> concentration as dependent variable.**

| <b>Variable</b>          | <b>Correlation coefficient</b> | <b><i>p</i>-value</b> | <b><i>n</i></b> |
|--------------------------|--------------------------------|-----------------------|-----------------|
| HOMA-IR                  | -0.092                         | 0.128                 | 283             |
| Triacylglycerols in VLDL | -0.137                         | 0.024                 | 284             |

HOMA-IR, homeostatic model assessment of insulin resistance

## ESM1

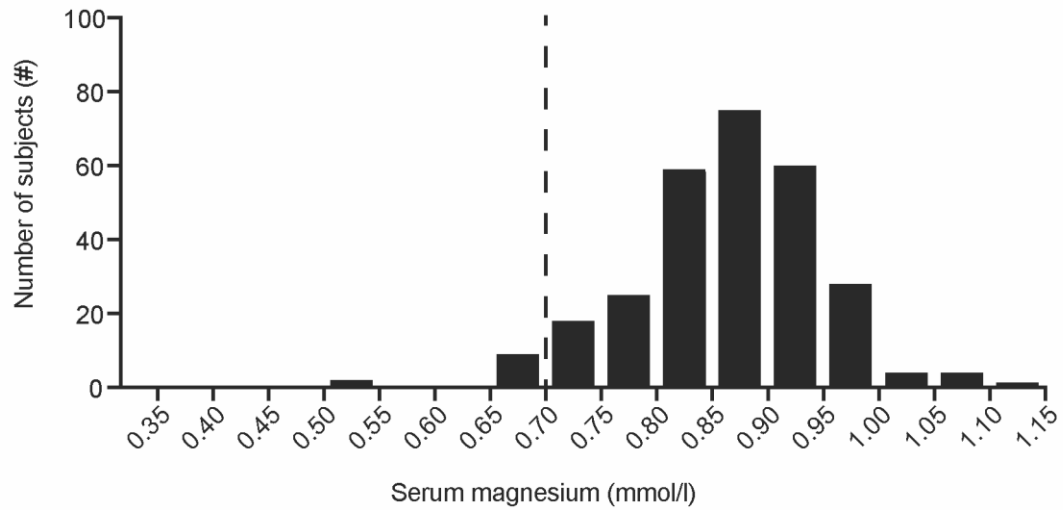

**ESM Fig. 1** Serum  $Mg^{2+}$  Distribution of the Overweight Subjects of the 300-Obesity Cohort. Distribution of the serum  $Mg^{2+}$  concentration of overweight subjects of the 300-Obesity cohort. The dotted vertical line indicates the threshold for hypomagnesemia.

## ESM2

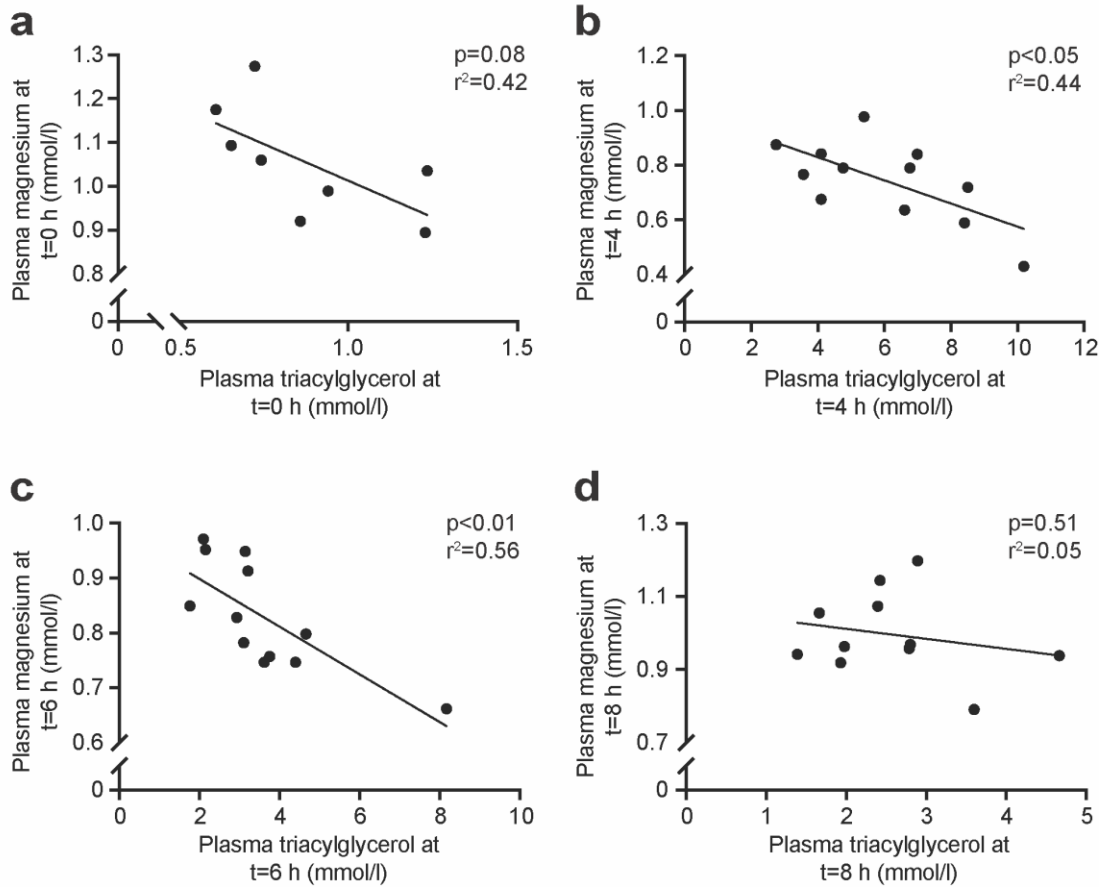

**ESM Fig. 2** Plasma  $Mg^{2+}$  and triacylglycerol concentrations inversely correlate in hypertriacylglycerolemic states.

(a-d) Linear regression analyses between serum  $Mg^{2+}$  and triacylglycerol concentrations at t = 0 (a,  $n=8$ ), 4 (b,  $n=12$ ), 6 (c,  $n=12$ ) and 8 (d,  $n=11$ ) hours post-gavage in wild-type mice, using data from Figure 1a. Each point represents an individual mouse; several mice were excluded due to insufficient sample availability.
